# Supplementary material
Source: PubMed Central journal article supplement (PMC7431363)
Supplement: mmc1.pdf [file mmc1.pdf]

**ONLINE SUPPLEMENT**  
to article in  
**RESEARCH IN SOCIAL STRATIFICATION AND MOBILITY**

**The Motherhood Penalty and the Fatherhood Premium in Employment During COVID-19: Evidence from the United States**

Felipe A. Dias  
*Tufts University*

Joseph Chance  
*Tufts University*

Arianna Buchanan  
*Duke University*

**Part 1 - Supplemental analysis: Employment-Population Ratio by Parental Status, Gender, and Education Level**

Figure S1. Prime Age Employment-Population Ratios by Parenthood and Gender for High School or Less

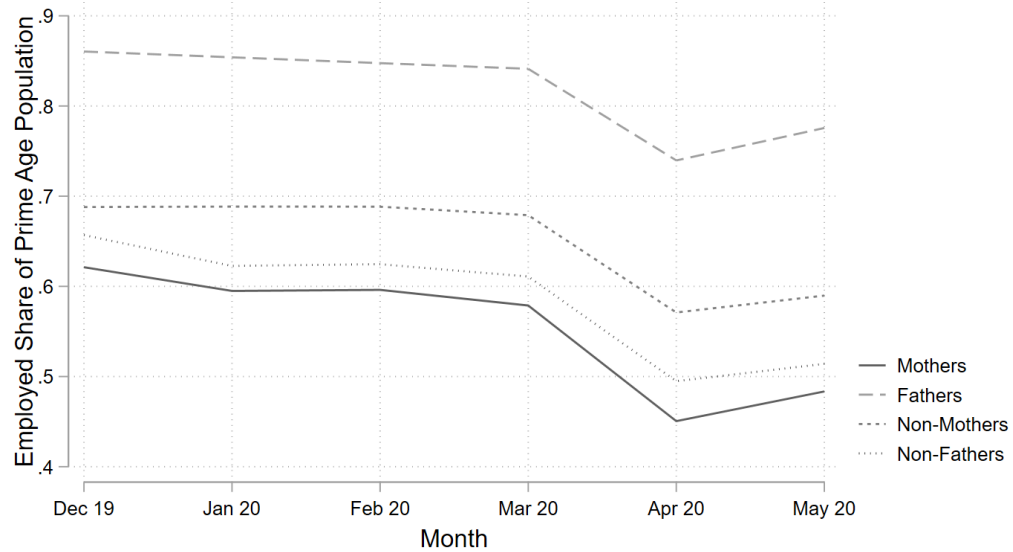

Source: CPS

Figure S2. Prime Age Employment-Population Ratios by Parenthood and Gender for BA Earners

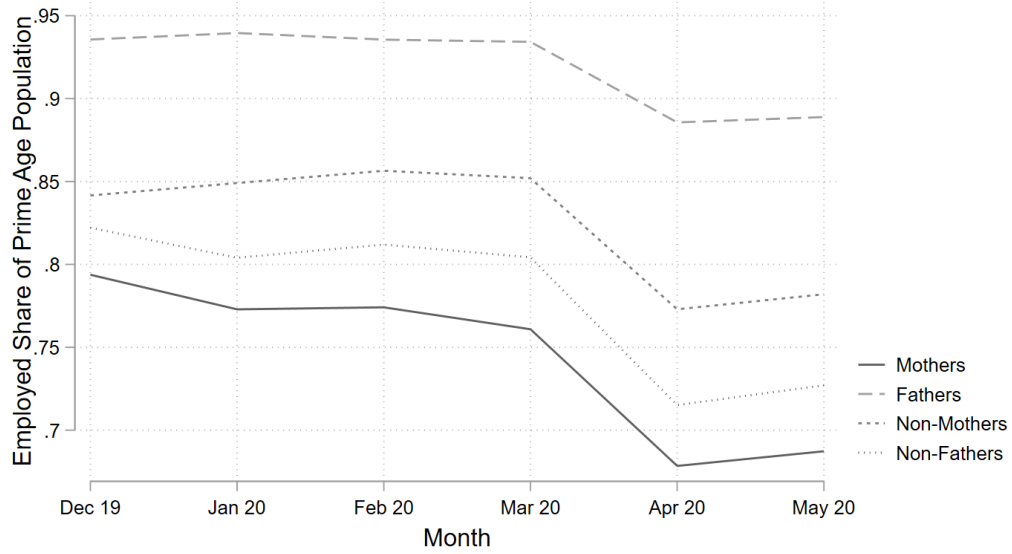

Source: CPS

Figure S3. Prime Age Employment-Population Ratios by Parenthood and Gender for Graduate Degree Earners

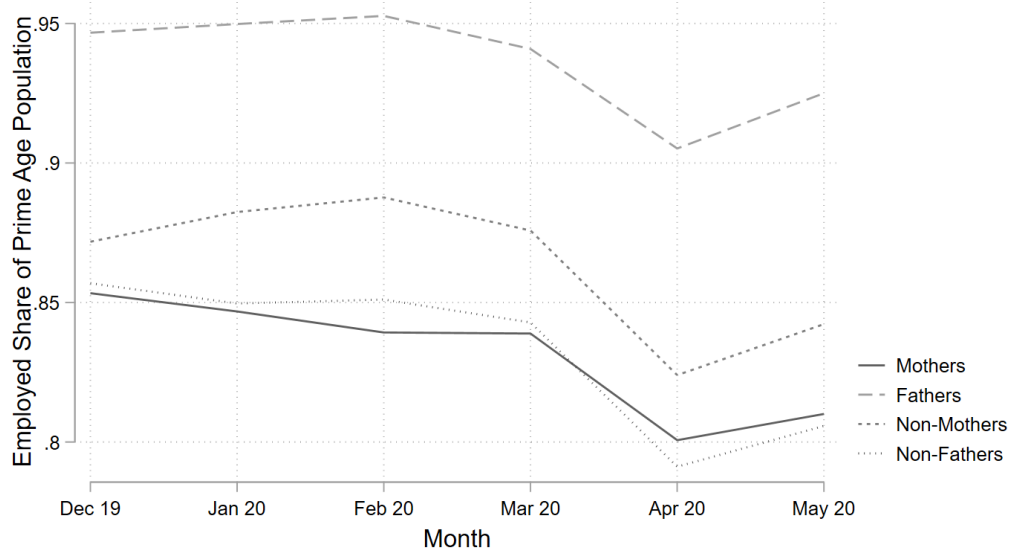

Source: CPS

Figures S1, S2, and S3 provide the employment-population ratio for prime age workers by parental status, gender, and education level from December 2019 through May 2020.<sup>1</sup> The employment rate for mothers with a high school degree or less decreased by 12.8 percentage points between March 2020 and April 2020, while fathers had a 10.2 percentage point decrease during the same period (Figure S1). We found strong evidence of a “fatherhood premium” among college educated workers. Among workers with a college degree, the decrease in employment rates were similar for mothers, non-mothers, and non-fathers (between 7.9 to 8.9 percentage points decrease). However, the employment rate decreased by only 4.9 percentage points for fathers during the same period (Figure S2). Among workers with a graduate degree, we find that mothers and fathers were less likely to change their employment status from employed to unemployed compared to non-parents (Figure S3).

---

<sup>1</sup> For Figures S1, S2, and S3, the number of employed in each group divided by the population aged 25 to 64 of each group.

## Part 2 - Supplemental analysis: Lay off Rates by Parental Status, Gender, and Education Level

Figure S4. Layoff Rates by HS Degree or less and Parenthood in U.S. Labor Force

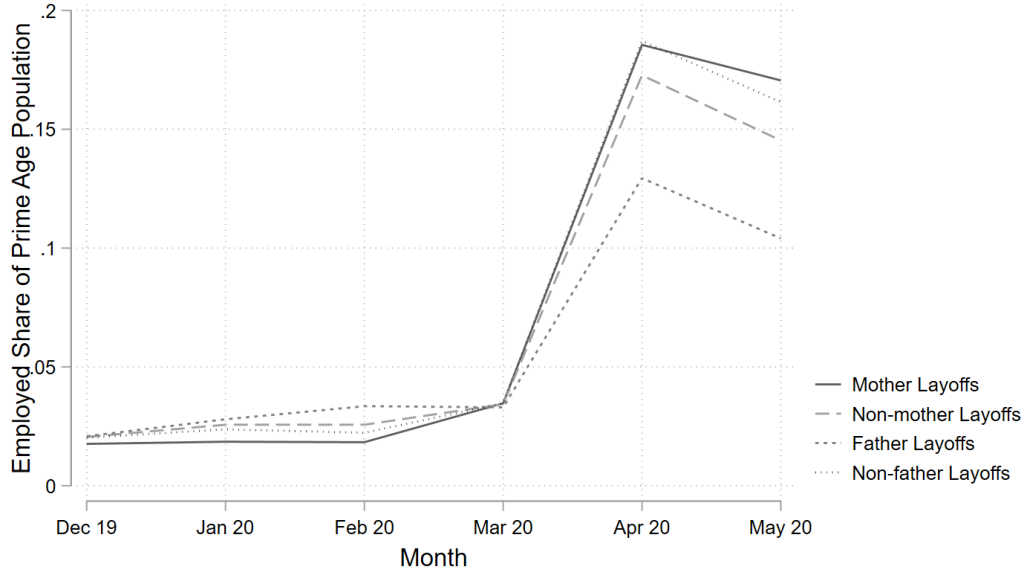

Source: CPS

Figure S5. Layoff Rates by Bachelor's Degree and Parenthood in U.S. Labor Force

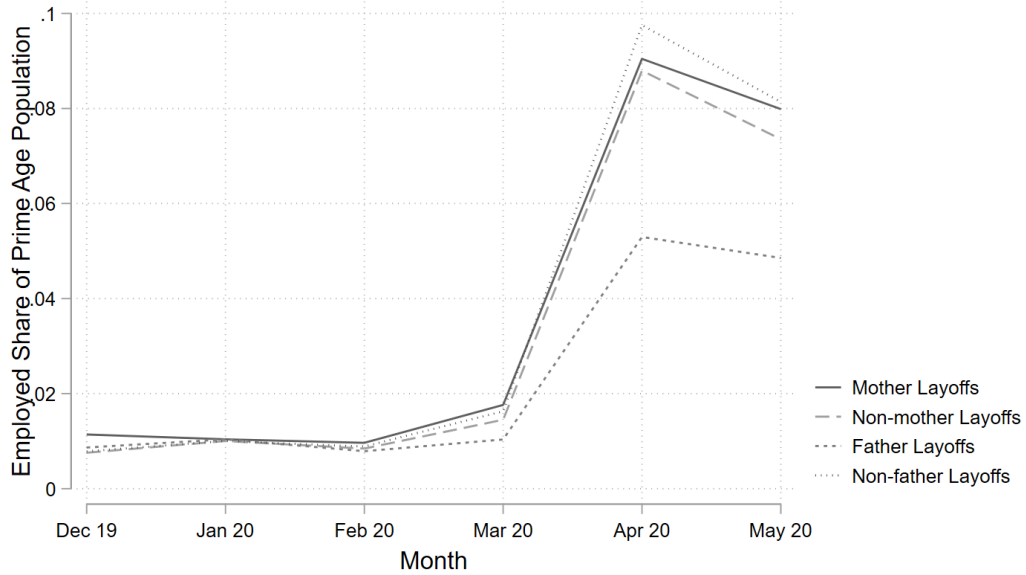

Source: CPS

Figure S6. Layoff Rates by Graduate Degree and Parenthood in U.S. Labor Force

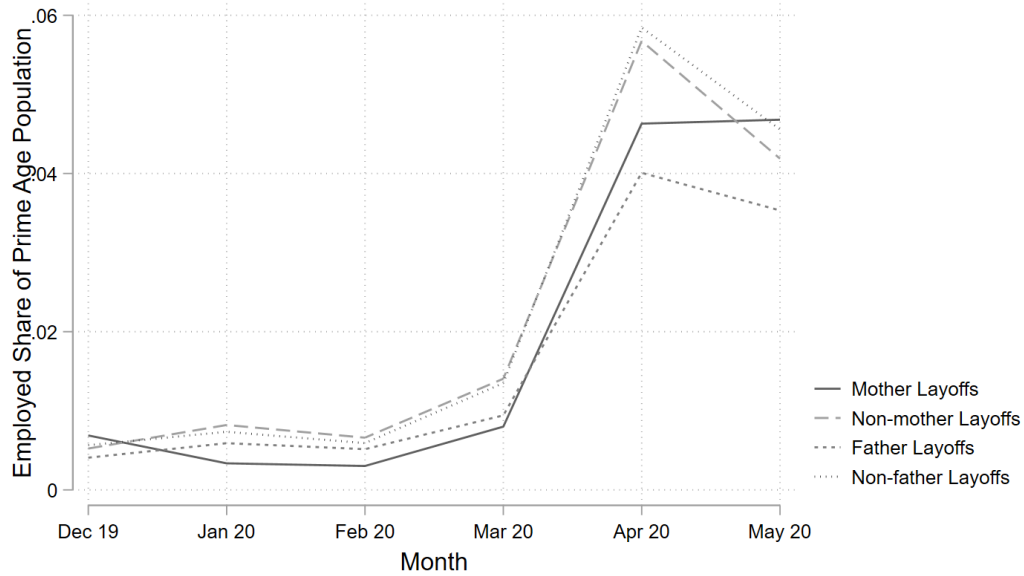

Source: CPS

Figures S4, S5, and S6 present layoff rates by parental status, gender, and education level. The fatherhood premium in the likelihood of being laid off following the shutdowns exists, especially among lower- and mid-educated workers. Among workers with a high school degree or less, fathers were less likely to be laid off (9.6 percentage point increase in layoff rate) compared to non-fathers (15.2 percentage point increase) and compared to mothers (15.1 percentage point increase) (Figure S4). Among workers with a bachelor's degree, fathers had only a modest increase in the layoff rate at 4.3 percentage points, compared to non-fathers, mothers, and non-mothers (8.1, 7.3, and 7.3 percentage point increase, respectively) (Figure S5). Among graduate degree earners, fathers had an advantage, albeit smaller in magnitude, in the likelihood of being laid off compared to mothers and non-parents (Figure S6).

### Part 3 – Summary Statistics

**Table S1. Summary Statistics for Regression Variables, All Members of Labor Force, CPS December 2019 to May 2020.**

| Variable                   | Mean  | Std. Dev. | Min | Max |
|----------------------------|-------|-----------|-----|-----|
| Employed                   | .936  | .245      | 0   | 1   |
| Unemployed Due to Job Loss | .044  | .204      | 0   | 1   |
| Unemployed Due to Quit     | .004  | .065      | 0   | 1   |
| Non-Father                 | .339  | .473      | 0   | 1   |
| Father                     | .182  | .386      | 0   | 1   |
| Mother                     | .177  | .381      | 0   | 1   |
| Non-Mother                 | .302  | .459      | 0   | 1   |
| Post-Outbreak Month        | .294  | .456      | 0   | 1   |
| Less than HS               | .073  | .261      | 0   | 1   |
| HS                         | .257  | .437      | 0   | 1   |
| Some College               | .277  | .447      | 0   | 1   |
| Bachelor's Degree          | .247  | .431      | 0   | 1   |
| Graduate Degree            | .147  | .354      | 0   | 1   |
| Age                        | 43.59 | 14.83     | 15  | 85  |
| Black                      | .101  | .301      | 0   | 1   |
| Other Non-White Race       | .084  | .277      | 0   | 1   |

## Part 4 – Interaction Regression Results

**Table S2: Interaction Regression Results**

|                                  | (1)                      | (2)                  |
|----------------------------------|--------------------------|----------------------|
|                                  | Unemployed Due to Layoff |                      |
| Post-Outbreak Month              | 0.105***<br>(0.002)      | 0.098***<br>(0.005)  |
| Non-Mother                       | -0.003***<br>(0.001)     | -0.001<br>(0.053)    |
| Non-Mother x Post-Outbreak Month | 0.023***<br>(0.003)      | 0.027***<br>(0.007)  |
| Father                           | 0.001<br>(0.001)         | -0.006<br>(0.026)    |
| Father x Post-Outbreak Month     | -0.039***<br>(0.003)     | -0.037***<br>(0.006) |
| Mother                           | 0.002<br>(0.001)         | 0.016<br>(0.040)     |
| Mother x Post-Outbreak Month     | 0.014***<br>(0.005)      | 0.013<br>(0.010)     |
| Individual Fixed Effects         | No                       | Yes                  |
| Obs.                             | 323,315                  | 42,656               |
| R-squared                        | 0.059                    | 0.503                |

Note: \*\*\*  $p < 0.01$ , \*\*  $p < 0.05$ , \*  $p < 0.1$ . Robust standard errors are in parentheses. The dependent variable in all columns is unemployment due to layoff. COVID-19 variable indicates observation in April or May 2020. Data in both columns from CPS at the person-month observation level. Baseline group in both columns is non-fathers. Column (1) observations include all labor force participants from December 2019 to May 2020. Column (2) observations include all labor force participants continuously surveyed February through May 2020 rounds of the CPS. Both columns include controls for age, education, and race. Column (2) includes individual fixed effects.

## Part 5. Job Postings from Burning Glass for Major Occupational Categories

Table S3: Online Job Postings from Burning Glass, March 2020 to April 2020

| Occupation Family                              | Percent female | Job Postings - March 2020 | Job Postings - April 2020 | Number of lost jobs March-April | Expected female job loss | Expected male job loss |
|------------------------------------------------|----------------|---------------------------|---------------------------|---------------------------------|--------------------------|------------------------|
| Office and Administrative Support              | 70.2%          | 359,648                   | 199,550                   | -160,098                        | -112,389                 | -47,709                |
| Food Preparation and Serving Related           | 57.6%          | 145,798                   | 81,770                    | -64,028                         | -36,880                  | -27,148                |
| Legal                                          | 66.0%          | 22,746                    | 13,884                    | -8,862                          | -5,849                   | -3,013                 |
| Personal Care and Service                      | 79.4%          | 82,065                    | 52,833                    | -29,232                         | -23,210                  | -6,022                 |
| Installation, Maintenance, and Repair          | 3.6%           | 106,349                   | 69,625                    | -36,724                         | -1,322                   | -35,402                |
| Management                                     | 39.7%          | 370,713                   | 244,019                   | -126,694                        | -50,298                  | -76,396                |
| Computer and Mathematical                      | 28.2%          | 367,193                   | 243,958                   | -123,235                        | -34,752                  | -88,483                |
| Arts, Design, Entertainment, Sports, and Media | 49.3%          | 74,611                    | 50,020                    | -24,591                         | -12,123                  | -12,468                |
| Healthcare Support                             | 87.6%          | 77,249                    | 52,654                    | -24,595                         | -21,545                  | -3,050                 |
| Building and Grounds                           |                |                           |                           |                                 |                          |                        |
| Cleaning and Maintenance                       | 42.8%          | 70,764                    | 49,780                    | -20,984                         | -8,981                   | -12,003                |
| Education, Training, and Library               | 76.7%          | 89,497                    | 63,668                    | -25,829                         | -19,811                  | -6,018                 |
| Transportation and Material Moving             | 20.7%          | 190,477                   | 136,743                   | -53,734                         | -11,123                  | -42,611                |
| Production                                     | 29.2%          | 91,673                    | 65,956                    | -25,717                         | -7,509                   | -18,208                |
| Farming, Fishing, and Forestry                 | 27.3%          | 3,208                     | 2,317                     | -891                            | -243                     | -648                   |
| Community and Social Services                  | 65.1%          | 43,298                    | 31,442                    | -11,856                         | -7,718                   | -4,138                 |
| Architecture and Engineering                   | 14.9%          | 93,201                    | 69,146                    | -24,055                         | -3,584                   | -20,471                |
| Sales and Related                              | 48.0%          | 370,898                   | 278,378                   | -92,520                         | -44,410                  | -48,110                |
| Protective Service                             | 22.6%          | 44,165                    | 33,651                    | -10,514                         | -2,376                   | -8,138                 |
| Business and Financial Operations              | 53.2%          | 215,445                   | 166,590                   | -48,855                         | -25,991                  | -22,864                |
| Construction and Extraction                    | 3.0%           | 40,139                    | 31,073                    | -9,066                          | -272                     | -8,794                 |
| Healthcare Practitioners and Technical         | 77.3%          | 399,536                   | 310,380                   | -89,156                         | -68,918                  | -20,238                |
| Life, Physical, and Social Science             | 46.5%          | 32,963                    | 26,399                    | -6,564                          | -3,052                   | -3,512                 |
| Military Specific                              | 14.7%          | 1,454                     | 1,426                     | -28                             | -4                       | -24                    |
| <b>Total jobs</b>                              |                | <b>3,293,090</b>          | <b>2,275,262</b>          | <b>-1,017,828</b>               | <b>-502,361</b>          | <b>-515,467</b>        |

Note: We estimated the expected job loss for males and females by using the March 2020 gender distribution for each of the 23 occupations and multiplying each percentage by the number of job losses. We added the expected job losses for each of the 23 occupations to estimate the total expected job loss for males and females.

Sources: For job postings data, we used Labor Insight (Burning Glass Technologies). For the gender composition by occupation, we used data from the Bureau of Labor Statistics.
